## **Characterizing altruistic motivation in potential volunteers for SARS-CoV-2 challenge trials**

Sophie M Rose<sup>1</sup>, Virginia L Schmit<sup>2</sup>, Thomas C Darton<sup>3</sup>, Nir Eyal<sup>4,5</sup>, Monica Magalhaes<sup>4</sup>, Josh Morrison<sup>2</sup>, Matthew Peeler<sup>7</sup>, Seema K Shah<sup>8,9</sup> & Abigail A Marsh<sup>\*10</sup>

<sup>1</sup> Department of Epidemiology, Johns Hopkins Bloomberg School of Public Health, Baltimore, Maryland, USA

<sup>2</sup> 1Day Sooner Research Team

<sup>3</sup> Department of Infection, Immunity, and Cardiovascular Disease, University of Sheffield, Sheffield, United Kingdom

<sup>4</sup> Center for Population-Level Bioethics, Rutgers University, New Brunswick, New Jersey, USA

<sup>5</sup> Department of Health Behavior, Society, and Policy, Rutgers School of Public Health, Piscataway, New Jersey, USA

<sup>6</sup> Department of Philosophy, Rutgers University, New Brunswick, New Jersey, USA

<sup>7</sup> Department of Mathematics, Rowan-Cabarrus Community College, Salisbury, North Carolina, USA

<sup>8</sup> Smith Child Health Outcomes, Research, and Evaluation Center, Lurie Children's Hospital, Chicago, Illinois, USA

<sup>9</sup> Department of Pediatrics, Northwestern University Feinberg School of Medicine, Chicago, Illinois, USA

<sup>10</sup> Department of Psychology, Georgetown University, Washington, DC, USA

**Abstract** (150 words)

In human challenge trials, volunteers are deliberately infected with a pathogen to accelerate vaccine development and answer key scientific questions. In the U.S., preparations for challenge trials with the novel coronavirus are complete, and in the U.K., challenge trials have recently begun. However, ethical concerns have been raised about the potential for invalid consent or exploitation. These concerns largely reflect worries that challenge trial volunteers may be unusually risk-seeking or too economically vulnerable to refuse the payments these trials provide, rather than being motivated primarily by altruistic goals. We conducted the first large-scale survey of intended human challenge trial volunteers and found that SARS-CoV-2 challenge trial volunteers exhibit high levels of altruistic motivations without any special indication of poor risk perception or economic vulnerability. Findings indicate that challenge trials with the novel coronavirus can attract volunteers with background conditions, attitudes, and motivations that should allay key ethical concerns.

**Keywords:** human challenge trials, controlled human infection model, COVID-19, altruism, risk perception, informed consent

1 The ongoing COVID-19 pandemic presents extraordinary threats to public health and human  
2 welfare. Economic and social recoveries will require ongoing development and testing of  
3 prevention strategies, including vaccines that are easier to provide, store, and deliver; various  
4 dosing regimens, and updating of vaccines to keep pace with emerging mutations<sup>1</sup>. Human  
5 challenge trials, in which volunteers are deliberately infected (or “challenged”) with the pathogen  
6 to test vaccine candidates, are among the most efficient and scientifically powerful approaches  
7 to testing vaccines and learning about early disease processes<sup>2</sup>. Well-designed human  
8 challenge trials can speed the development of improved vaccines by selecting the most  
9 promising candidates to prioritize for further testing<sup>3,4,5,6,7,8</sup>.

10 The potential for benefits from challenge trials are largely societal. By contrast, the risks and  
11 burdens of challenge trials—including infection-related risks, prolonged period of  
12 biocontainment and possible trial vaccine or treatment side effects—fall largely on volunteers<sup>9</sup>.  
13 These risks and burdens (which are heightened by uncertainty about COVID-19 disease  
14 outcomes) coupled with the absence of obvious direct benefits for volunteers have led some  
15 bioethicists to suggest that challenge trials using the novel coronavirus may be unethical<sup>10,11,12</sup>.  
16 Some commentators worry that challenge trials might attract volunteers who are vulnerable to  
17 undue inducement or problems understanding relevant risks, which might invalidate volunteers’  
18 consent or result in their exploitation<sup>13,14</sup>.

19 Addressing ethical concerns is made all the more pressing now that a COVID-19 human  
20 challenge trial has recently begun in the United Kingdom<sup>15</sup>. However, there are limited data on  
21 volunteer motivations and understanding for participation in human challenge trials, and none  
22 on volunteers willing to participate in challenge trials with the novel coronavirus<sup>16,17,18</sup>.

23 Direct benefits to participants are not required for human subjects research to be considered  
24 ethical<sup>19</sup>. Instead, the totality of the benefits—including benefits to others—should be sufficient  
25 to justify the risks. Trials also should be designed to expose participants to as few risks as  
26 possible, and participants must be able to provide valid informed consent<sup>20</sup>. This requires  
27 providing volunteers with the opportunity to evaluate the risks, benefits, and alternatives to any  
28 intervention to ensure that it reflects their goals, preferences, and values<sup>21</sup>.

29 Given the altruistic nature of challenge trial participation—with volunteers required to take on  
30 personal risks and costs to achieve societal benefits—it would be ideal from an ethical  
31 perspective if volunteers demonstrated highly altruistic goals, values and preferences. To date,  
32 few studies have examined why healthy volunteers consent to research with net risks and

33 burdens to themselves, or whether their goals and values are compatible with ethical  
34 participation<sup>16,17,22,23,24,25</sup>. To assess whether a group of individuals who proactively declared  
35 their intent to volunteer to participate in a COVID-19 challenge trial meets these conditions, we  
36 conducted the first large-scale evaluation of characteristics of potential challenge trial  
37 volunteers. Volunteers were recruited through the non-profit advocacy organization 1Day  
38 Sooner (<https://www.1daysooner.org/>). 1Day Sooner was created in April 2020 to accelerate the  
39 deployment of effective vaccines by supporting preparation efforts for COVID-19 challenge trials  
40 and to advocate on behalf of COVID-19 human challenge trial volunteers. It curates the only  
41 centralized international database of volunteers who have indicated their willingness to partake  
42 in COVID-19 challenge trials.

43 We hypothesized that COVID-19 challenge trial volunteerism reflects heightened altruistic  
44 values and preferences. In light of concerns that challenge trials may attract participants who  
45 are unusually insensitive to risk or who are in dire economic need<sup>10,11,17</sup>, we also tested the  
46 alternate hypotheses that challenge trials attract participants who engage in elevated risk  
47 behaviors (including specifically health and safety related risk behaviors) or those who are  
48 economically or otherwise vulnerable to exploitation. Either of these issues could raise concerns  
49 about the ethical permissibility of trials, although trialists could still try to select for those  
50 intended volunteers who have accurate risk perceptions and no socioeconomic motivations.

51 To test these hypotheses, we conducted a pre-registered (<https://osf.io/fqyrb>) study in which we  
52 measured altruistic motivation, values, and behavior; risk preferences and behaviors, and  
53 sociodemographic variables in 1,911 potential COVID-19 challenge trial volunteers. We  
54 compared volunteers to 999 controls recruited to reflect approximate 2019 US Census  
55 demographics, whose characteristics are described in [Table 1](#).

## 56 **Results**

### 57 ***Socio-demographic variables***

58 Most volunteers (66.2%) were between 18 and 45 years of age, identified as non-Hispanic white  
59 (78.5%), and had a bachelor's degree or higher (77.4%). A majority reported residing in the  
60 United States (81.5%), followed by Canada (7.6%), the United Kingdom (2.3%) and Germany  
61 (1.0%). Most volunteers had either private health insurance or access to healthcare through  
62 publicly-funded health systems (88.1%). Approximately one in three volunteers (32.0%) lived  
63 alone, and a similar proportion (34.4%) lived with only one other person. 28.7% of volunteers

64 had at least one child. Half of volunteers were employed full-time (50.8%) and most (71.9%)  
65 reported an annual household income greater than US \$50,000. Of the total, 213 reported an  
66 annual household income less than US \$25,000 (see [Table 1](#)); 23% of these (49/213) were  
67 students.

68 Comparing the two groups, more volunteers were male (60.4%, N=1151) relative to the general  
69 population and our controls (43.9%, N=439). Of volunteers, 35.3% self-identified as female  
70 (N=680); 3.2% self-identified as non-binary or transgender (N=61), and 1.1% did not specify  
71 their gender (N=21). Volunteers were generally younger (44.0% under age 35 versus 23.8% of  
72 controls) and more educated (77.5% reported earning a Bachelor's degree or higher, versus  
73 52.1% of controls). Volunteers were also wealthier; assuming equal distribution within income  
74 categories, 61.9% of volunteers were above the U.S. median income (\$68,703 annually),  
75 compared to 45.7% of the control group. Of volunteers, 11.8% fell below the U.S. poverty line  
76 (\$26,172 annually for a family of four), compared to 23.0% of controls<sup>26</sup>. Volunteers and controls  
77 reported equal levels of health insurance (88.1% of both groups).

### 78 ***Altruistic values and preferences***

79 Following our pre-registered analysis plan, we conducted an exploratory factor analysis on  
80 responses to the 10 motivations for volunteering (see Supplementary Information), which  
81 returned a three factor solution, with one factor comprising the two altruistic motivations. The  
82 percentages of participants who selected each of the motivations were calculated ([Table 2](#)). The  
83 two altruistic motivations were the only options selected by majorities of respondents; both were  
84 selected by over three-quarters of volunteers ("I wanted to help others and potentially save  
85 lives" (95.9%) and "I wanted to contribute to the progress of medicine" (79.2%)). The third most  
86 highly ranked choice ("I feel helpless and this is a way to do something positive" (46.6%)) was  
87 selected by a minority of volunteers, as were the remaining options.

88  
89 We next conducted chi-square tests to compare challenge trial volunteers' and controls' prior  
90 engagement in altruistic behavior and found that volunteers were more likely than controls to  
91 have participated in all but one of these behaviors ([Figure 1](#)). More volunteers reported having  
92 previously donated blood (V: 75.5%, C: 62.5%,  $\chi^2(1)=54.020$ ,  $p<0.001$ ), having donated  
93 significant amounts of money to charity (V: 75.3%, C: 50.3%,  $\chi^2(1)=175.374$ ,  $p<0.001$ ),  
94 registering as a bone marrow donor (V: 35.5%, C: 14.7%,  $\chi^2(1)=124.284$ ,  $p<0.001$ ) or being a  
95 registered deceased organ donor (V: 85.8%, C: 47.4%,  $\chi^2(1)=460.221$ ,  $p<0.001$ ). More controls

96 reported being living kidney or liver donors (V: 1.2%, C: 9.6%,  $\chi^2(1)=116.813$ ,  $p<0.001$ ), but  
97 positive response rates for controls were implausibly high given the overall prevalence of living  
98 organ donation (per capita prevalence < 1 in 100,000), suggesting results for this question may  
99 not be reliable.

100

101 **Figure 1. Volunteer group motivations for participating in human challenge studies and**  
102 **comparison of engagement in altruistic behaviors by volunteer vs. control groups**

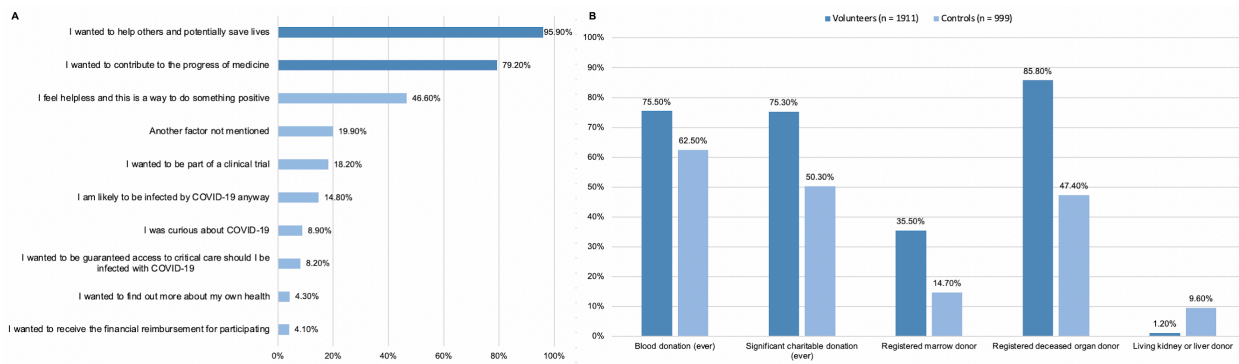

103

104 We next compared volunteer and control groups along each HEXACO dimension using an  
105 ANCOVA model, controlling for age, income, education level, gender and country of residence.  
106 Effect sizes were calculated using eta-squared ( $\eta^2$ ) values<sup>27</sup>, with effect sizes <0.01 considered  
107 trivial, effect sizes 0.01-0.06 small, effect sizes 0.06-0.14 medium, and effect sizes >0.14 large.  
108 Average scores for volunteers were significantly higher than controls on all but one of the  
109 HEXACO dimensions, with the largest effect sizes obtained for Honesty-Humility (V: 4.25, C:  
110 3.67,  $p<0.001$ ,  $\eta^2=0.128$ ) and Openness to Experience (V: 3.96, C: 3.44,  $p <0.001$ ,  $\eta^2=0.119$ ). In  
111 contrast, volunteers scored lower on Emotionality, but this effect size was small (V: 2.55, C:  
112 2.84,  $p=0.03$ ,  $\eta^2 < 0.03$ ) ([Table 3](#)).

113 We used logistic regression analyses to predict the likelihood of a participant being in the  
114 challenge study volunteer group based solely on HEXACO outcomes. Results indicated that  
115 volunteer status was most strongly predicted by openness to experience (OR: 4.60, 95% CI:  
116 3.91, 5.41,  $d=0.841$ ) when controlling for the five other HEXACO dimensions. Honesty-Humility  
117 was the next most strongly associated with volunteer group membership (OR: 2.36, 95% CI:  
118 2.05, 2.72,  $d=0.473$ ). Other dimensions were less strongly associated (effect sizes 0.101-  
119 0.238)<sup>27</sup>. This model had a Cox & Snell  $R^2 = 0.246$  and an Akaike Information Criterion (AIC)  
120 value of 2751.09<sup>28</sup>.



121 We then added demographic covariates to the above model, including age, gender, education  
122 level, income, and country of residence to control for the potential influence of these differences  
123 between volunteers and controls. Results indicate that, after controlling for these variables,  
124 volunteer status was most strongly associated with Openness to Experience (OR: 4.32, 95% CI:  
125 3.53, 5.29, Cohen's  $d=0.806$ ) and Honesty-Humility (OR: 4.28, 95% CI: 3.52, 5.20, Cohen's  
126  $d=0.801$ ) ([Table 4](#) and Supplemental Table 1). Agreeableness was not associated with group  
127 membership (OR: 0.99, 95% CI: 0.81, 1.21). Effect sizes for other HEXACO dimensions ranged  
128 from 0.175 to 0.238. In addition, education level and income were both found to be significantly  
129 associated with volunteer group membership with a large effect size ([Table 5](#)). For example,  
130 study participants with an education level equivalent to a Bachelor's degree had 144-fold odds  
131 of being a member of the volunteer group compared to those with less than high school  
132 equivalent education (OR: 144.14,  $p<0.001$ ,  $d=2.74$ ). Participants with an annual income of  
133 greater than \$200,000 had 4.19-fold odds of being a member of the volunteer group compared  
134 to those earning less than \$25,000 annually. This model had a total Cox & Snell  $R^2 = 0.432$  (with  
135 HEXACO dimension covariates accounting for 16.4% of  $R^2$ ) and an AIC value of 2070.92,  
136 indicating that the addition of demographic covariates improved the fit of the model overall.

### 137 ***Risk sensitivity***

138 We next compared risk behaviors and evaluations across the two groups. We predicted that  
139 volunteers would not, in general, exhibit more risk-taking behaviors or risk insensitivity relative  
140 to controls<sup>29</sup>. We compared groups on the six DOSPERT risk domains for each of the three  
141 components using an ANCOVA model ([Table 6](#) and Supplemental Table 3 and 4), which  
142 included an additional covariate for age, and included the categorical variables of income,  
143 education level, gender, and US residency as fixed effects to control for the potential role of  
144 demographic differences between volunteers and controls. Results indicated that volunteers  
145 differed from controls in risk-taking attitudes in all domains. However, the volunteer group was  
146 not consistently the more risk-seeking group. Relative to controls, volunteers demonstrated  
147 greater risk-aversion in the domains of ethics, gambling, and health and safety. This effect was  
148 greatest for risk aversion relating to ethical (V: 1.73, C: 2.60,  $p<0.001$ ,  $\eta^2=0.113$ ) and financial-  
149 gambling scenarios (V: 1.40, C: 2.45,  $p<0.001$ ,  $\eta^2=0.107$ ). By contrast, volunteers were more  
150 risk-seeking than controls with respect to financial investing, recreational activities, and social  
151 behaviors (for example, challenging norms or authority). The effect size of risk-seeking was  
152 greatest within the social domain (V: 5.39, C: 4.40,  $p<0.001$ ,  $\eta^2=0.126$ ). Other dimensions of risk-  
153 taking showed small differences across the groups ( $\eta^2=0.004-0.028$ ).

154 We also identified significant differences between volunteers and controls on the *risk-perception*  
155 component of the DOSPERT across all domains, with the exception of the ethical domain. The  
156 strengths of associations were mostly small or trivial ( $\eta^2 < 0.01-0.06$ ). However, medium effects  
157 were observed for the perception of social risk, which was greater in controls than volunteers (V:  
158 2.71, C: 3.47,  $p < 0.001$ ,  $\eta^2 = 0.08$ ). Finally, with respect to the *perceived-benefits scale* of the  
159 DOSPERT, volunteers perceived risk-taking behaviors in the ethical (V: 2.04, C: 2.83,  $p <$   
160  $0.001$ ,  $\eta^2 = 0.085$ ), financial-gambling (V: 2.04, C: 3.03,  $p < 0.001$ ,  $\eta^2 = 0.081$ ) and health and  
161 safety domains (V: 1.80, C: 2.48,  $p < 0.001$ ,  $\eta^2 = 0.084$ ) as significantly less beneficial than did  
162 controls (all medium effect sizes). Exceptions included the recreational (V: 3.27, C: 3.02,  $p <$   
163  $0.001$ ,  $\eta^2 = 0.006$ ) and social domains (V: 4.37, C: 3.94,  $p < 0.001$ ,  $\eta^2 = 0.025$ ), which volunteers  
164 perceived as more beneficial than did controls (although differences had trivial and small effect  
165 sizes, respectively).

166 Further analyses regarding risk-perception relating to COVID-19 and challenge trial participation  
167 identified in the pre-registration plan were beyond the scope of this paper and will be discussed  
168 in forthcoming papers.

## 169 **Discussion**

170 Together, these results indicate that the characteristics of volunteers for COVID-19 challenge  
171 trials do not substantiate concerns regarding understanding, vulnerability, or undue influence.  
172 Volunteerism was overwhelmingly associated with heightened altruistic motivation and behavior.  
173 Nearly all volunteers reported altruistic motivations for volunteering, and demonstrated high  
174 levels of prior engagement in other forms of altruism, including donating blood, donating money  
175 to charity, and registering as living marrow donors and deceased organ donors. Volunteers also  
176 scored higher in personality traits like Honesty-Humility that reflect high valuation of others  
177 relative to the self<sup>30</sup>. Together, these metrics suggest that those who volunteer to participate in  
178 COVID-19 human challenge trials (the benefits of which primarily accrue to others) exhibit  
179 reliably altruistic motivations, preferences, and values consistent with the goals of these trials.

180 We did not find evidence that challenge trial volunteerism is disproportionately associated with  
181 psychological or demographic factors that might raise ethical concerns. Comparing risk  
182 perceptions and behaviors between volunteers and controls, we found that group differences  
183 were generally small in magnitude and did not suggest that volunteers were generally  
184 insensitive to factors that compromise physical health or safety. Although volunteers indicated  
185 that they would be more likely than controls to take risks in social, recreational, and investment



186 domains, they indicated being less likely to take risks in the health and safety domain. Group  
187 differences in ratings may reflect in part the different risk/benefit profiles that the two groups  
188 perceived for different categories of risk. Volunteers perceived slightly lower risks in the health  
189 and safety domain than controls ( $\eta^2=0.003$ ), but also perceived lower benefits to activities in that  
190 domain ( $\eta^2=0.087$ ).

191 We also found no evidence that volunteerism is associated with high levels of socioeconomic  
192 vulnerability that might make volunteers subject to exploitation. Due to the lengthy quarantine  
193 period required in COVID-19 challenge trials, the recently approved U.K. trial will compensate  
194 volunteers £1,500 for a 17-day quarantine. We cannot rule out the possibility that this payment,  
195 meant to compensate for quarantine only, may nonetheless attract people seeking economic  
196 gain, which might be construed as coercion or undue inducement to participate (see Largent et  
197 al 2017<sup>31</sup> for a review of the debate on coercion and undue inducement). Our results indicate  
198 that challenge trials will likely be able to attract participants with non-economic motives.  
199 Volunteers in our sample reported higher levels of income and education relative to population  
200 medians and relative to controls, and equivalent levels of health insurance as controls. The high  
201 median educational attainment of volunteers (over three-quarters of whom reported having a  
202 Bachelor's degree or higher) also matters, as it suggests that volunteers are relatively well-  
203 positioned to understand the information disclosed during the consent process<sup>32</sup>.

204 Of note, majorities of volunteers were male and between the ages of 18 and 45. A high  
205 proportion (78.5%) identified as non-Hispanic white. These socio-demographic variables confer  
206 both risk factors for and protective factors against serious COVID-19 outcomes. It is generally  
207 accepted that challenge trials should include only young and medically healthy volunteers<sup>2,33</sup>,  
208 but the role that other socio-demographic risk factors should play in volunteer enrollment is  
209 debated. Male biological sex confers clear risks of serious illness or death following infection,  
210 with males' average case-fatality ratio being 1.7 times higher than females', an effect thought to  
211 reflect sex-based differences in innate and adaptive immune responses<sup>34,35</sup>. COVID-19 related  
212 fatalities and hospitalizations are dramatically elevated among participants who identify as  
213 Black, Latino, and Native American, likely due to structural inequities and socioeconomic factors  
214 affecting health<sup>36</sup>. Some advocates of COVID-19 challenge trials have proposed including  
215 volunteers from diverse backgrounds to ensure adequate representation of demographic groups  
216 that have been hardest hit by the pandemic<sup>37</sup>. More than twenty percent of the over 38,000  
217 volunteers recruited through 1Day Sooner come from underrepresented groups, suggesting that  
218 challenge trials enrolling from this pool could include a diverse group of participants.

219 Together, these findings are inconsistent with expressed concerns that human challenge trials  
220 with the novel coronavirus would be “*prima facie* unethical” because they would be expected to  
221 follow a “pattern of exploitative recruitment”<sup>11</sup>. Whereas human challenge trial recruitment could  
222 be viewed as inherently exploitative if it attracted volunteers who find participation “very  
223 attractive as a result of being in a socioeconomically disadvantaged position as a result of social  
224 injustice”<sup>11</sup> or whose volunteerism reflects “financial desperation, or a distorted understanding of  
225 the risks”<sup>38</sup>, our results indicate that such trials tend to attract volunteers who are primarily  
226 motivated by altruism and do not on the whole exhibit any indicators of socioeconomic or  
227 psychological vulnerability to exploitation.

228 These results should be interpreted in light of certain limitations. First, the survey was  
229 conducted in a sample of early volunteers who signed up with 1Day Sooner in April and May of  
230 2020, the earliest weeks of its creation. Volunteers sampled here may not be representative of  
231 all challenge trial volunteers, and those who have subsequently volunteered may be different.  
232 We also cannot know what proportion of intended volunteers would pass exclusionary screening  
233 and consent to participate in a challenge trial. It is possible that this subset would be small or  
234 non-representative of the volunteers characterized in our study, similar to observations that  
235 altruistic marrow donors represent only a fraction of those who initially volunteer to donate<sup>39</sup>.  
236 However, we have no basis for assuming what specific changes in the composition of challenge  
237 trial volunteers would result in. In addition, our sample of controls, whilst recruited to reflect  
238 national United States characteristics established by 2019 census data (including age, gender,  
239 education and income), are not truly representative of the United States population as a whole.  
240 Nor can we rule out, based on our data, the possibility that challenge trial volunteerism reflects  
241 unmeasured biases related to the perception of risks and benefits, such as optimism bias<sup>10,40</sup>;  
242 the so-called preventative or therapeutic fallacy, which reflects a common assumption that any  
243 treatment offered by medical professionals must be potentially beneficial<sup>41,42</sup>; or unrealistic  
244 beliefs about potential personal gains. To some degree, such concerns can be resolved through  
245 a robust informed consent process<sup>16,17,43</sup>, which is broadly viewed as possible for COVID-19  
246 challenge trials<sup>2,33,44,45,46</sup>. If, as our findings suggest, intended COVID-19 challenge trial  
247 volunteers are mostly aware of and prepared to take the personal risks associated with such  
248 studies to benefit the greater good, then, given the large number of intended volunteers to come  
249 forth in a short amount of time, we can expect that there will be a sufficient number of altruistic  
250 volunteers able to provide valid consent to make these trials both ethical and feasible.

251 **Conclusions**

252 Self-interest is sometimes incorrectly assumed to be the central or sole value driving human  
253 decisions<sup>47,48</sup>, which may contribute to pervasive concerns that volunteerism for risky and  
254 primarily other-benefiting biomedical procedures reflects undue inducement or problems  
255 understanding consent. However, people vary widely in their selfish versus altruistic preferences  
256 and values<sup>30,49</sup>. Those who volunteer for biomedical procedures that confer net personal risks  
257 and burdens without direct benefits (like kidney and marrow donations) place unusually high  
258 value on others' welfare relative to their own<sup>39,50</sup>. Such donations are now broadly accepted as  
259 ethical despite their risks and absence of direct benefits to volunteers because they are  
260 consistent with donors' values and preferences. In finding that challenge trials can attract  
261 volunteers whose altruistic preferences and values align with the goals of these trials (and who  
262 are not unusually vulnerable to exploitation), the present findings similarly support the possibility  
263 of valid informed consent for COVID-19 challenge trials.

264 **Methods** (1225 words)

265 **Participants**

266 2,910 individuals completed a 45-minute online survey that included indices of altruistic  
267 motivation, values, and behavior; an assessment of risk preferences and behaviors, and a  
268 survey of sociodemographic variables. Questions presented to the volunteer and control group  
269 are available in Supplementary Data. The sample included 1,911 individuals who had confirmed  
270 their willingness to participate in SARS-CoV-2 challenge trials prior to May 29, 2020 and 999  
271 controls. We recruited the maximum sample size possible within our financial constraints.  
272 Potential challenge trial volunteers were recruited through the non-profit advocacy organization  
273 1Day Sooner. Volunteers who had declared their intent to volunteer and provided their contact  
274 information as well as their interest in participating in research were recruited via email ([Figure](#)  
275 [2](#)).

276 **Figure 2: CONSORT Diagram of Volunteer and Control Group Enrollment and Analysis**

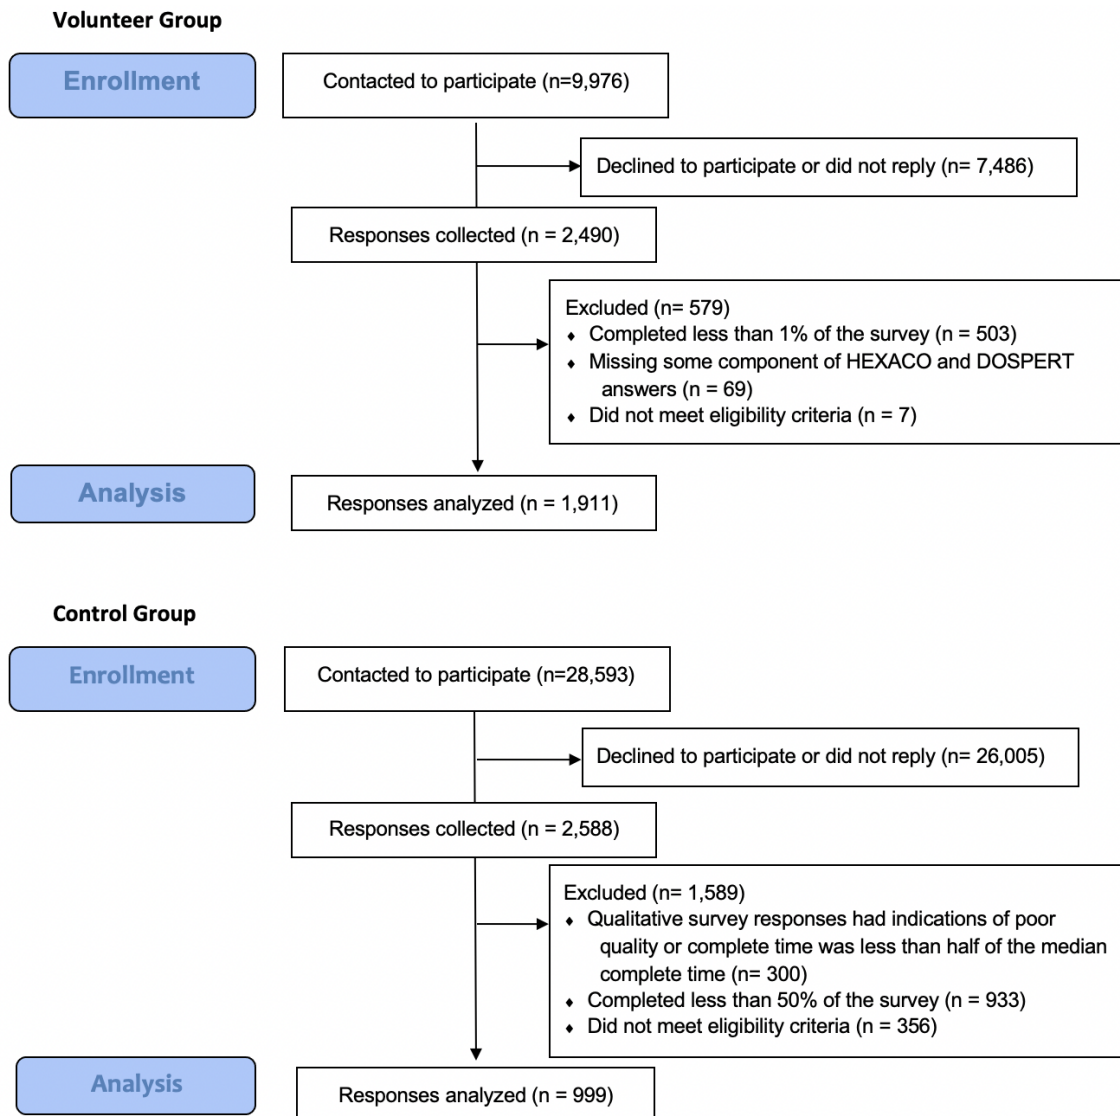

277  
278

279 Control participants were recruited using a private research software company (Qualtrics  
280 Panel), which identifies individuals through other survey-hosting platforms and is intended to be  
281 reflective of the population distribution captured by the 2019 United States Census. Inclusion  
282 criteria for all participants included age greater than 18 years and demonstrated proficiency in  
283 English. Volunteers in the database were excluded from sampling if they were under age 18,  
284 responded 'no' to a query about wanting to participate in a vaccine challenge trial, declined to  
285 share their information with researchers, or declined to provide a response to a query about  
286 reasons for participating (open response format). Participants who responded to this question

287 were filtered if they responded in a language other than English, or if responses were too brief  
288 ( $\leq 5$  words) to ascertain fluency in English. All participants who completed the survey were  
289 compensated \$5 USD in the form of an electronic gift card. Participants who expressed interest  
290 in completing the survey were allotted 7 days to complete it at a time of their choosing, and  
291 could complete it in more than one sitting if they preferred. Those who did not complete the  
292 survey were sent follow-up emails on Day 4 and Day 6 to give them the opportunity to complete  
293 their response. The protocol was approved by the Institutional Review Board at Rutgers  
294 University (Study ID: Pro2020001023) and all participants provided electronic informed consent  
295 before beginning the survey. All statistical tests for this study were taken from the same sample  
296 and are two-tailed tests.

### 297 ***Survey Instruments***

298 Indices of altruistic values and preferences were as follows: First, the volunteer group selected  
299 their top three motivations for volunteering from a list of 10 possible motivations drawn from  
300 consultations with a panel of challenge study researchers and bioethicists ([Table 2](#)) (controls did  
301 not complete this section)<sup>16,18,25,51</sup>. Two motivations were primarily altruistic in that they refer to  
302 outcomes for entities outside the self (“I wanted to help others and potentially save lives” and “I  
303 wanted to contribute to the progress of medicine”); the other 8 reflected various other  
304 motivations (e.g., “I wanted to receive the financial reimbursement for participating” or “I was  
305 curious about COVID-19”). Second, participants indicated their prior engagement in various  
306 altruistic behaviors that carry varying levels of risk and cost, including blood donation,  
307 registering to donate bone marrow, registering to be a deceased organ donor, donating money  
308 to charity, and living organ donation. Participants completed two additional instruments  
309 assessing personality traits and risk perception. The Brief HEXACO inventory is a 24-item  
310 measure assessing six dimensions of personality: Honesty-Humility, Emotionality, eXtraversion,  
311 Agreeableness, Conscientiousness, and Openness to Experience<sup>52,53</sup>. Each item is rated on a  
312 five-point scale. Unlike five-factor inventories, HEXACO inventories include a subscale  
313 (Honesty-Humility) that specifically indexes attitudes and behaviors related to valuation of  
314 outcomes for others versus the self (such as exploitation, manipulation, or deceit) and has been  
315 consistently linked to prosocial motivation and behavior<sup>30,54,55</sup>. The DOSPERT scale is a 30-item  
316 index that assesses three primary components of risk attitudes (risk-taking, risk-perception and  
317 perceived expected benefits) across six broad decision categories: ethical, financial (divided into  
318 investment and gambling), health and safety, social, and recreational risks<sup>56</sup>. The *risk-taking*  
319 *scale* assesses respondents’ likelihood of engaging in the risky activity or behavior, the *risk-*

320 *perception scale* assesses how risky participants perceive each of these activities to be, and the  
321 *expected-benefits scale* assesses how beneficial participants perceive each activity to be.  
322 Responses are made using a 7-point scale (1 = Extremely unlikely/Not at all risky/No benefits at  
323 all, 7 = Extremely likely/ Extremely risky/Great benefits). Finally, all participants completed an  
324 assessment of socioeconomic and other demographic variables ([see Table 1](#) for a description of  
325 these demographic characteristics). Regression models for all analyses included the covariates  
326 of age, gender, education level, income and country of residence to control for the potential  
327 influence of differences in these characteristics. Age was included as a continuous (scale)  
328 variable, centered at the mean age of 43.67 years. Gender was analyzed as a categorical  
329 variable, broken down into male (reference), female, self-describe or prefer not to say.  
330 Education was analyzed as a categorical variable (high school equivalent or less, trade or  
331 technical school, associate degree, some college, bachelor's degree, masters degree,  
332 professional or doctoral degree). Income was analyzed as a categorical variable with six  
333 categories: less than \$25k annual household income, \$25k-\$50k, \$50k-\$100k, \$100k-\$200k,  
334 greater than \$200k, and prefer not to say. Country of residence was dichotomized as non-US  
335 (reference) and US.

### 336 **HEXACO Analysis**

337 Analysis of the HEXACO results began with an exploratory factor analysis (EFA) to assess  
338 factor components. The EFA found six factors that roughly corresponded to the six dimensions  
339 captured by the HEXACO model ( $r^2=0.526$ ) (see Supplementary Methods and Supplementary  
340 Table 2 for a comparison of the HEXACO dimensions and Survey EFA components by  
341 question). Therefore, subsequent analyses were performed using the standard six HEXACO  
342 dimensions. Firstly, scores on each HEXACO dimension were compared across volunteer and  
343 control groups using an ANCOVA model controlling for age, income, education level, country of  
344 residence and gender. Subsequent analyses were conducted to determine the likelihood of  
345 participants being in the volunteer or control group based on their HEXACO scores. These  
346 analyses were initially conducted using a multivariate logistic regression containing only the six  
347 HEXACO dimensions as independent variables, and membership in the volunteer group as the  
348 dependent variable. An additional multivariate analysis including the demographic covariates of  
349 age, gender, education level, income, and US residency was then conducted.



350 ***DOSPERT Analysis***

351 Preliminary analysis of the DOSPERT was also performed using EFA to match the factors of the  
352 two groups to the DOSPERT domains. A separate EFA was performed on each component of  
353 the DOSPERT scale (risk-taking, risk perception, and perceived expected benefits) (See  
354 Supplementary Methods for a comparison of the DOSPERT factors across the three  
355 components). As the association between the DOSPERT component and EFA results were  
356 moderate for all three components ( $r^2=0.536$ ,  $0.568$  and  $0.614$  respectively), further analyses  
357 were performed using the original six DOSPERT domains: Ethical, Financial - Investment,  
358 Financial - Gambling, Health/Safety, Recreational and Social. Risk behaviors and evaluations  
359 were compared across the volunteer and control groups using an ANCOVA model that included  
360 an additional covariate for age, and included the categorical variables of income, education level,  
361 gender, and country of residence as fixed effects to control for the potential role of demographic  
362 differences between volunteers and controls.

## References

1. Johnson, C. Y. Variants mean the coronavirus is here to stay — but perhaps as a lesser threat. *Washington Post* (2021).
2. World Health Organization. Key criteria for the ethical acceptability of COVID-19 human challenge studies. (2020).
3. Meiring, J. E., Giubilini, A., Savulescu, J., Pitzer, V. E. & Pollard, A. J. Generating the Evidence for Typhoid Vaccine Introduction: Considerations for Global Disease Burden Estimates and Vaccine Testing Through Human Challenge. *Clinical Infectious Diseases* **69**, S402–S407 (2019).
4. Cooper, M. M., Loiseau, C., McCarthy, J. S. & Doolan, D. L. Human challenge models: tools to accelerate the development of malaria vaccines. *Expert Review of Vaccines* **18**, 241–251 (2019).
5. Roestenberg, M., Hoogerwerf, M.-A., Ferreira, D. M., Mordmüller, B. & Yazdanbakhsh, M. Experimental infection of human volunteers. *The Lancet Infectious Diseases* **18**, e312–e322 (2018).
6. Roestenberg, M., Kamerling, I. M. C. & de Visser, S. J. Controlled Human Infections As a Tool to Reduce Uncertainty in Clinical Vaccine Development. *Front. Med.* **5**, (2018).
7. Sauerwein, R. W., Roestenberg, M. & Moorthy, V. S. Experimental human challenge infections can accelerate clinical malaria vaccine development. *Nature Reviews Immunology* **11**, 57–64 (2011).
8. Hodgson, S. H. *et al.* What defines an efficacious COVID-19 vaccine? A review of the challenges assessing the clinical efficacy of vaccines against SARS-CoV-2. *The Lancet Infectious Diseases* **21**, e26–e35 (2021).
9. Nguyen, L. C. *et al.* Evaluating Use Cases for Human Challenge Trials in Accelerating SARS-CoV-2 Vaccine Development. *Clinical Infectious Diseases* **72**, 710–715 (2021).
10. Kahn, J. P., Henry, L. M., Mastroianni, A. C., Chen, W. H. & Macklin, R. Opinion: For now, it's unethical to use human challenge studies for SARS-CoV-2 vaccine development. *PNAS* **117**, 28538–28542 (2020).
11. Holm, S. Controlled human infection with SARS-CoV-2 to study COVID-19 vaccines and treatments: bioethics in Utopia. *Journal of Medical Ethics* **46**, 569–573 (2020).
12. Bramble, B. Challenge trials for a coronavirus vaccine are unethical – except for in one unlikely scenario. *The Conversation* (2020).
13. Franklin, G. M. & Grady, C. The Ethical Challenge of Infection-Inducing Challenge Experiments. *Clinical Infectious Diseases* **33**, 1028–1033 (2001).
14. Evers, D. L., Fowler, C. B., Mason, J. T. & Mimnall, R. K. Deliberate Microbial Infection Research Reveals Limitations to Current Safety Protections of Healthy Human Subjects. *Sci Eng Ethics* **21**, 1049–1064 (2015).
15. Department for Business, Energy & Industrial Strategy & The Rt Hon Kwasi Kwarteng MP. World's first coronavirus Human Challenge study receives ethics approval in the UK. GOV.UK <https://www.gov.uk/government/news/worlds-first-coronavirus-human-challenge-study-receives-ethics-approval-in-the-uk> (2021).
16. Njue, M. *et al.* Ethical considerations in Controlled Human Malaria Infection studies in low resource settings: Experiences and perceptions of study participants in a malaria Challenge study in Kenya [version 2; peer review: 2 approved]. *Wellcome Open Res* **3**, (2018).

17. Kraft, S. A. *et al.* Exploring Ethical Concerns About Human Challenge Studies: A Qualitative Study of Controlled Human Malaria Infection Study Participants' Motivations and Attitudes. *Journal of Empirical Research on Human Research Ethics* **14**, 49–60 (2019).
18. Jao, I. *et al.* Deliberately infecting healthy volunteers with malaria parasites: Perceptions and experiences of participants and other stakeholders in a Kenyan-based malaria infection study. *Bioethics* **34**, 819–832 (2020).
19. Miller, F. G. *The ethical challenges of human research: selected essays*. (Oxford University Press, 2012).
20. National Commission for the Protection of Human Subjects of Biomedical and Behavioral Research. *The Belmont Report*. <https://www.hhs.gov/ohrp/regulations-and-policy/belmont-report/read-the-belmont-report/index.html> (1979).
21. Schenker, Y. & Meisel, A. Informed Consent in Clinical Care: Practical Considerations in the Effort to Achieve Ethical Goals. *JAMA* **305**, 1130–1131 (2011).
22. Evans, D. An activist's argument that participant values should guide risk–benefit ratio calculations in HIV cure research. *Journal of Medical Ethics* **43**, 100–103 (2017).
23. Sylla, L. *et al.* If We Build It, Will They Come? Perceptions of HIV Cure-Related Research by People Living with HIV in Four U.S. Cities: A Qualitative Focus Group Study. *AIDS Research and Human Retroviruses* **34**, 56–66 (2018).
24. Murray, B. R. *et al.* What risk of death would people take to be cured of HIV and why? A survey of people living with HIV. *Journal of Virus Eradication* **5**, 109–115 (2019).
25. Oguti, B. *et al.* Factors influencing participation in controlled human infection models: a pooled analysis from six enteric fever studies [version 1; peer review: 3 approved with reservations]. *Wellcome Open Res* **4**, 153 (2019).
26. Semega, J., Kollar, M., Shrider, E. A. & Creamer, J. *Income and Poverty in the United States: 2019*. <https://www.census.gov/library/publications/2020/demo/p60-270.html> (2020).
27. Cohen, J. *Statistical power analysis for the behavioral sciences*. (L. Erlbaum Associates, 1988).
28. McElreath, R. *Statistical rethinking: a Bayesian course with examples in R and Stan*. (CRC Press, 2018).
29. Marsh, A. A. *et al.* Neural and cognitive characteristics of extraordinary altruists. *PNAS* **111**, 15036–15041 (2014).
30. Zettler, I., Thielmann, I., Hilbig, B. E. & Moshagen, M. The Nomological Net of the HEXACO Model of Personality: A Large-Scale Meta-Analytic Investigation. *Perspect Psychol Sci* **15**, 723–760 (2020).
31. Largent, E. A. & Lynch, H. F. Paying Research Participants: Regulatory Uncertainty, Conceptual Confusion, and a Path Forward. *Yale J Health Policy Law Ethics* **17**, 61–141 (2017).
32. Christopher, P. P., Foti, M. E., Roy-Bujnowski, K. & Appelbaum, P. S. Consent Form Readability and Educational Levels of Potential Participants in Mental Health Research. *PS* **58**, 227–232 (2007).
33. Eyal, N., Lipsitch, M. & Smith, P. G. Human Challenge Studies to Accelerate Coronavirus Vaccine Licensure. *The Journal of Infectious Diseases* **221**, 1752–1756 (2020).

34. Scully, E. P., Haverfield, J., Ursin, R. L., Tannenbaum, C. & Klein, S. L. Considering how biological sex impacts immune responses and COVID-19 outcomes. *Nature Reviews Immunology* **20**, 442–447 (2020).
35. Peckham, H. *et al.* Male sex identified by global COVID-19 meta-analysis as a risk factor for death and ICU admission. *Nature Communications* **11**, (2020).
36. Rossen, L. M., Branum, A. M., Ahmad, F. B., Sutton, P. & Anderson, R. N. Excess Deaths Associated with COVID-19, by Age and Race and Ethnicity — United States, January 26–October 3, 2020. *MMWR Morb Mortal Wkly Rep* **69**, 1522–1527 (2020).
37. McPartlin, S. O., Morrison, J., Rohrig, A. & Weijer, C. Covid-19 vaccines: Should we allow human challenge studies to infect healthy volunteers with SARS-CoV-2? *BMJ* **371**, m4258 (2020).
38. Wolemonwu, V. C. Human Challenge Trials for a COVID-19 Vaccine: Should we bother about exploitation? *VIB* **6**, (2020).
39. Vekaria, K. M. *et al.* The role of prospection in altruistic bone marrow donation decisions. *Health Psychology* **39**, 316–324 (2020).
40. Weinstein, N. D. Unrealistic optimism about future life events. *Journal of Personality and Social Psychology* **39**, 806–820 (1980).
41. Jansen, L. A. *et al.* Unrealistic Optimism in Early-Phase Oncology Trials. *IRB* **33**, 1–8 (2011).
42. Horng, S. & Grady, C. Misunderstanding in Clinical Research: Distinguishing Therapeutic Misconception, Therapeutic Misestimation, & Therapeutic Optimism. *IRB: Ethics & Human Research* **25**, 11–16 (2003).
43. Cassileth, B. R., Zupkis, R. V., Sutton-Smith, K. & March, V. Informed Consent — Why Are Its Goals Imperfectly Realized? *N Engl J Med* **302**, 896–900 (1980).
44. Jamrozik, E. & Selgelid, M. J. Ethical Issues. in *Human Challenge Studies in Endemic Settings: Ethical and Regulatory Issues* 25–82 (Springer International Publishing, 2021). doi:[10.1007/978-3-030-41480-1\\_3](https://doi.org/10.1007/978-3-030-41480-1_3).
45. Chappell, R. Y. & Singer, P. Pandemic ethics: the case for risky research. *Research Ethics* **16**, 1–8 (2020).
46. WHO Expert Committee on Biological Standardization. Human Challenge Trials for Vaccine Development: regulatory considerations. (2016).
47. Miller, D. T. The norm of self-interest. *American Psychologist* **54**, 1053–1060 (1999).
48. Elster, J. Chapter 3 Altruistic Behavior and Altruistic Motivations. in *Handbook of the Economics of Giving, Altruism and Reciprocity* (eds. Kolm, S.-C. & Ythier, J. M.) vol. 1 183–206 (Elsevier, 2006).
49. Schwartz, S. H. Universals in the Content and Structure of Values: Theoretical Advances and Empirical Tests in 20 Countries. in *Advances in Experimental Social Psychology* (ed. Zanna, M. P.) vol. 25 1–65 (Academic Press, 1992).
50. Vekaria, K. M., Brethel-Haurwitz, K. M., Cardinale, E. M., Stoycos, S. A. & Marsh, A. A. Social discounting and distance perceptions in costly altruism. *Nature Human Behaviour* **1**, 1–7 (2017).
51. Hoogerwerf, M.-A., Vries, M. de & Roestenberg, M. Money-oriented risk-takers or deliberate decision-makers: a cross-sectional survey study of participants in controlled human infection trials. *BMJ Open* **10**, e033796 (2020).

52. de Vries, R. E. The 24-item Brief HEXACO Inventory (BHI). *Journal of Research in Personality* **47**, 871–880 (2013).
53. Lee, K. & Ashton, M. C. Psychometric Properties of the HEXACO Personality Inventory. *Multivariate Behavioral Research* **39**, 329–358 (2004).
54. Brocklebank, S., Pauls, S., Rockmore, D. & Bates, T. C. A spectral clustering approach to the structure of personality: Contrasting the FFM and HEXACO models. *Journal of Research in Personality* **57**, 100–109 (2015).
55. Weller, J. A. & Tikir, A. Predicting domain-specific risk taking with the HEXACO personality structure. *Journal of Behavioral Decision Making* **24**, 180–201 (2011).
56. Blais, A.-R. & Weber, E. U. A Domain-Specific Risk-Taking (DOSPERT) Scale for Adult Populations. *Judgment and Decision Making* **1**, 33–47 (2006).

## Figure Captions

**Figure 1. (A)** Participants in the volunteer group were asked to indicate their top three motivations for participating in a COVID-19 challenge trial from a list of ten options. Selections were not ranked, and total percentages add to 300% because each participant selected 3 options. The two most commonly selected options were “I wanted to help others and potentially save lives” (95.9%) and “I wanted to contribute to the progress of medicine” (79.2%). **(B)** Participants in volunteer and control groups were surveyed on their engagement with a range of altruistic behaviors, including blood donation, significant charitable donations and organ/marrow donor status. Volunteers were significantly more likely than controls to have participated in all but one of the altruistic behaviors.

**Figure 2.** Overall, 9,976 volunteers from the 1Day Sooner database who had indicated they were interested in contributing to further research were contacted to participate in our study. Of these, 7,486 volunteers did not reply or declined to participate. The remaining 2,490 volunteers completed the survey via the Qualtrics platform. 579 of these responses were ultimately excluded from the final analysis, due to failure to complete sufficient portions of the survey, missing data or submitting a birth date that indicated they were under 18 years of age. The remaining 1,911 responses were then analyzed.



## Tables

**Table 1: Participant demographic characteristics**

|                                    | <b>Volunteer Group<br/>(n=1911)<br/>N.o. people (%)</b> | <b>Control<br/>(n=999)<br/>N.o. people (%)</b> |
|------------------------------------|---------------------------------------------------------|------------------------------------------------|
| <b>Age</b>                         |                                                         |                                                |
| 18-25                              | 252 (13.3)                                              | 91 (9.4)                                       |
| 26-35                              | 580 (30.7)                                              | 139 (14.4)                                     |
| 36-45                              | 419 (22.2)                                              | 195 (20.1)                                     |
| 46-55                              | 297 (15.7)                                              | 189 (19.5)                                     |
| 56-65                              | 229 (12.1)                                              | 139 (14.4)                                     |
| 66-75                              | 99 (5.2)                                                | 180 (18.6)                                     |
| 76+                                | 12 (0.6)                                                | 35 (3.5)                                       |
| Non-responses                      | 23                                                      | 31                                             |
| <b>Gender</b>                      |                                                         |                                                |
| Male                               | 1151 (60.4)                                             | 436 (43.9)                                     |
| Female                             | 673 (35.3)                                              | 522 (52.5)                                     |
| Self-identify/Prefer not to say    | 82 (4.3)                                                | 36 (3.6)                                       |
| Non-response                       | 5                                                       | 5                                              |
| <b>Marital Status</b>              |                                                         |                                                |
| Single (never married)             | 976 (51.1)                                              | 289 (29.1)                                     |
| Married/Domestic partnership       | 664 (34.7)                                              | 523 (52.6)                                     |
| Divorced                           | 200 (10.5)                                              | 121 (12.2)                                     |
| Widowed                            | 27 (1.4)                                                | 48 (4.8)                                       |
| Separated                          | 44 (2.3)                                                | 13 (1.3)                                       |
| Non-responses                      | 0                                                       | 5                                              |
| <b>Race/Ethnicity</b>              |                                                         |                                                |
| Selected African (Yes/No (%Yes))   | 28/1883 (1.5)                                           | 95/904 (9.5)                                   |
| Selected Hispanic (Yes/No (%Yes))  | 133/1778 (7.0)                                          | 59/940 (5.9)                                   |
| Selected Caucasian (Yes/No (%Yes)) | 1595/316 (83.5)                                         | 706/293 (70.7)                                 |

Altruistic motivation in COVID-19 challenge trial volunteers 7

|                                             |                 |                |
|---------------------------------------------|-----------------|----------------|
| Selected Asian (Yes/No (% Yes))             | 162/1749 (8.5)  | 110/889 (12.4) |
| Selected Native American (Yes/No (% Yes))   | 32/1879 (1.7)   | 19/980 (1.9)   |
| <b>Employment (Top 5 categories listed)</b> |                 |                |
| Employed                                    | 1009 (52.8)     | 394 (39.4)     |
| Self-employed/Freelance                     | 197 (10.3)      | 52 (5.2)       |
| Retired                                     | 137 (7.2)       | 240 (24.0)     |
| Studying                                    | 121 (6.3)       | 36 (3.6)       |
| Unemployed/Looking for work                 | 115 (6.0)       | 80 (8.0)       |
| <b>Employment Status</b>                    |                 |                |
| Employed full-time                          | 941 (49.3)      | 323 (32.6)     |
| Unemployed                                  | 728 (38.2)      | 593 (59.9)     |
| Employed part-time                          | 239 (12.5)      | 74 (7.5)       |
| Non-responses                               | 3               | 9              |
| <b>Income (in USD)</b>                      |                 |                |
| Less than \$25K                             | 211 (11.0)      | 217 (21.8)     |
| \$25K-\$50K                                 | 326 (17.1)      | 248 (24.9)     |
| \$50K-\$100K                                | 512 (26.8)      | 203 (20.4)     |
| \$100K-\$200K                               | 458 (24.0)      | 240 (24.1)     |
| Greater than \$200K                         | 260 (13.6)      | 67 (6.7)       |
| Prefer not to say                           | 143 (7.5)       | 21 (2.1)       |
| Non-responses                               | 1               | 3              |
| <b>Have health insurance</b>                |                 |                |
| Yes                                         | 1683 (88.1)     | 877 (88.1)     |
| No                                          | 180 (9.4)       | 95 (9.5)       |
| Not sure                                    | 29 (1.5)        | 10 (1.0)       |
| Prefer not to say                           | 18 (0.9)        | 14 (1.4)       |
| Non-responses                               | 1               | 3              |
| <b>Have Children (Yes/No (% Yes))</b>       | 549/1360 (28.8) | 494/499 (49.7) |
| Non-responses                               | 2               | 6              |

Altruistic motivation in COVID-19 challenge trial volunteers 8

|                                              |            |            |
|----------------------------------------------|------------|------------|
| <b>Number in Household (other than self)</b> |            |            |
| 0                                            | 611 (32.2) | 267 (27.0) |
| 1                                            | 656 (34.5) | 353 (35.7) |
| 2                                            | 260 (13.7) | 152 (15.4) |
| 3                                            | 228 (12.0) | 116 (11.7) |
| 4                                            | 89 (4.7)   | 73 (7.4)   |
| 5                                            | 34 (1.8)   | 21 (2.1)   |
| 6                                            | 11 (0.6)   | 5 (0.5)    |
| 7                                            | 2 (0.1)    | 2 (0.2)    |
| 8+                                           | 9 (0.5)    | 1 (0.1)    |
| Non-responses                                | 11         | 9          |
| <b>Education Level</b>                       |            |            |
| Less than High School                        | 4 (0.2)    | 22 (2.2)   |
| High School Graduate/GED                     | 84 (4.4)   | 163 (16.3) |
| Some college, no degree                      | 218 (11.4) | 149 (14.9) |
| Trade/Technical training                     | 65 (3.4)   | 42 (4.2)   |
| Associate degree                             | 59 (3.1)   | 102 (10.2) |
| Bachelor's degree                            | 684 (35.8) | 280 (28.1) |
| Master's degree                              | 498 (26.1) | 172 (17.3) |
| Professional degree                          | 119 (6.2)  | 44 (4.4)   |
| Doctoral degree                              | 180 (9.4)  | 23 (2.3)   |
| Non-responses                                | 0          | 2          |

**Table 2: Volunteer group motivations for participating in human challenge studies**

| Motivation                                                                           | Number (%) rating motivation in the top three reasons for volunteering <sup>1</sup> |
|--------------------------------------------------------------------------------------|-------------------------------------------------------------------------------------|
| I wanted to help others and potentially save lives                                   | 1832 (95.9)                                                                         |
| I wanted to contribute to the progress of medicine                                   | 1513 (79.2)                                                                         |
| I feel helpless and this is a way to do something positive                           | 890 (46.6)                                                                          |
| Another factor not mentioned                                                         | 380 (19.9)                                                                          |
| I wanted to be part of a clinical trial                                              | 348 (18.2)                                                                          |
| I am likely to be infected by COVID-19 anyway                                        | 282 (14.8)                                                                          |
| I was curious about COVID-19                                                         | 170 (8.9)                                                                           |
| I wanted to be guaranteed access to critical care should I be infected with COVID-19 | 156 (8.2)                                                                           |
| I wanted to find out more about my own health                                        | 83 (4.3)                                                                            |
| I wanted to receive the financial reimbursement for participating                    | 79 (4.1)                                                                            |

<sup>1</sup> Since volunteers were asked to rate whether the choices above were in their top three reasons, percentages total 300% instead of 100% (with exceptions due to rounding).

**Table 3: Comparisons of HEXACO dimension scores by volunteer vs. control group membership**

|                              | Volunteer Group<br>(n=1911) |              | Control<br>(n=999) |              | p-value | η <sup>2</sup> |
|------------------------------|-----------------------------|--------------|--------------------|--------------|---------|----------------|
|                              | Mean (SE)                   | 95% CI       | Mean (SE)          | 95% CI       |         |                |
| <b>Honesty-Humility (H)</b>  | 4.249 (0.015)               | 4.219, 4.278 | 3.672 (0.022)      | 3.629, 3.715 | <0.001  | 0.128          |
| <b>Emotionality (E)</b>      | 2.554 (0.016)               | 2.523, 2.585 | 2.840 (0.023)      | 2.795, 2.885 | <0.001  | 0.032          |
| <b>EXtraversion (X)</b>      | 3.915 (0.016)               | 3.883, 3.947 | 3.483 (0.024)      | 3.436, 3.530 | <0.001  | 0.065          |
| <b>Agreeableness (A)</b>     | 3.071 (0.014)               | 3.044, 3.099 | 2.918 (0.021)      | 2.878, 2.958 | <0.001  | 0.012          |
| <b>Conscientiousness (C)</b> | 3.727 (0.016)               | 3.697, 3.758 | 3.498 (0.023)      | 3.453, 3.543 | <0.001  | 0.021          |
| <b>Openness to</b>           | 3.964 (0.014)               | 3.936, 3.991 | 3.442 (0.021)      | 3.402, 3.483 | <0.001  | 0.119          |

Altruistic motivation in COVID-19 challenge trial volunteers 10

|                                                                                                                                                                                                                                                                                                                                                                                                                                                                 |  |  |  |  |  |  |
|-----------------------------------------------------------------------------------------------------------------------------------------------------------------------------------------------------------------------------------------------------------------------------------------------------------------------------------------------------------------------------------------------------------------------------------------------------------------|--|--|--|--|--|--|
| <b>Experience (O)</b>                                                                                                                                                                                                                                                                                                                                                                                                                                           |  |  |  |  |  |  |
| <p>Age was considered a covariate and the other categorical variables were treated as fixed effects. Marginal means by group are the means for the two groups controlled for all covariates (assuming the mean age of the sample of 43.58). P-values were calculated using F-tests. Effect sizes were calculated using eta-squared (<math>\eta^2</math>), with cutpoints for small, medium, and large effects defined as 0.01, 0.06, and 0.14 respectively.</p> |  |  |  |  |  |  |

**Table 4: Odds of challenge volunteer membership by HEXACO dimension using logistic regression model, adjusted for gender, age, education, country of residence and income**

| HEXACO Dimension              | Wald statistic | p-value | Odds Ratio | 95% CI for OR | Cohen's d |
|-------------------------------|----------------|---------|------------|---------------|-----------|
| <i>Honesty/Humility</i>       | 214.268        | < 0.001 | 4.278      | 3.521, 5.197  | 0.801     |
| <i>Emotionality</i>           | 15.675         | < 0.001 | 0.684      | 0.567, 0.826  | 0.209     |
| <i>eXtraversion</i>           | 22.814         | < 0.001 | 1.539      | 1.289, 1.836  | 0.238     |
| <i>Agreeableness</i>          | 0.012          | 0.912   | 0.989      | 0.811, 1.206  |           |
| <i>Conscientiousness</i>      | 10.309         | 0.001   | 0.728      | 0.600, 0.884  | 0.175     |
| <i>Openness to Experience</i> | 199.581        | < 0.001 | 4.318      | 3.525, 5.290  | 0.806     |

**Table 5: Odds of challenge volunteer membership by gender, age, education, country of residence and income using logistic regression model, adjusted for HEXACO dimensions**

| Covariate                   | Category                 | Wald    | p-value | Odds Ratio | Cohen's d |
|-----------------------------|--------------------------|---------|---------|------------|-----------|
| <i>Age</i>                  | <i>&gt;43.67 years</i>   | 229.729 | < 0.001 | 0.938      | 0.035     |
| <i>Country of Residence</i> | <i>US Resident</i>       | 84.017  | < 0.001 | 0.032      | 1.898     |
| <i>Gender</i>               | <i>Female</i>            | 56.887  | < 0.001 | 0.400      | 0.505     |
|                             | <i>Self-Describe</i>     | 4.032   | 0.045   | 2.234      | 0.443     |
|                             | <i>Prefer not to say</i> | 1.633   | 0.201   | 0.542      | 0.338     |
| <i>Education</i>            | <i>High School</i>       | 9.224   | 0.002   | 26.554     | 1.808     |
|                             | <i>Associate</i>         | 12.235  | < 0.001 | 45.843     | 2.109     |
|                             | <i>Some college</i>      | 18.239  | < 0.001 | 101.516    | 2.547     |

Altruistic motivation in COVID-19 challenge trial volunteers 11

|               |                          |        |         |         |       |
|---------------|--------------------------|--------|---------|---------|-------|
|               | <b>Bachelor's</b>        | 21.306 | < 0.001 | 144.142 | 2.741 |
|               | <b>Masters</b>           | 23.931 | < 0.001 | 197.931 | 2.915 |
|               | <b>Doctoral</b>          | 31.619 | < 0.001 | 526.136 | 3.454 |
|               | <b>Professional</b>      | 20.433 | < 0.001 | 142.864 | 2.736 |
|               | <b>Trade/Technical</b>   | 15.812 | < 0.001 | 82.654  | 2.434 |
| <b>Income</b> | <b>\$25k-\$50k</b>       | 9.679  | 0.002   | 1.880   | 0.348 |
|               | <b>\$50k-\$100k</b>      | 28.734 | < 0.001 | 2.873   | 0.582 |
|               | <b>\$100k-\$200k</b>     | 12.297 | < 0.001 | 1.996   | 0.381 |
|               | <b>\$200k +</b>          | 33.161 | < 0.001 | 4.195   | 0.791 |
|               | <b>Prefer not to say</b> | 62.390 | < 0.001 | 17.841  | 1.589 |

**Table 6: Comparisons of DOSPERT risk attitude component scores**

|                               | Volunteer Group<br>(n=1911) |              | Control<br>(n=999) |              | p-value | η <sup>2</sup> |
|-------------------------------|-----------------------------|--------------|--------------------|--------------|---------|----------------|
|                               | Mean (SE)                   | 95% CI       | Mean (SE)          | 95% CI       |         |                |
| <b>Risk taking likelihood</b> |                             |              |                    |              |         |                |
| Ethical                       | 1.730 (0.025)               | 1.682, 1.778 | 2.598 (0.036)      | 2.528, 2.668 | <0.001  | 0.113          |
| Financial - Investment        | 3.700 (0.034)               | 3.635, 3.766 | 3.496 (0.049)      | 3.400, 3.591 | 0.001   | 0.004          |
| Financial - Gambling          | 1.398 (0.031)               | 1.338, 1.458 | 2.448 (0.045)      | 2.361, 2.536 | <0.001  | 0.107          |
| Health/Safety                 | 2.590 (0.028)               | 2.535, 2.644 | 2.913 (0.041)      | 2.833, 2.993 | <0.001  | 0.013          |
| Recreational                  | 3.543 (0.035)               | 3.473, 3.612 | 2.953 (0.051)      | 2.852, 3.054 | <0.001  | 0.028          |
| Social                        | 5.394 (0.025)               | 5.346, 5.443 | 4.467 (0.036)      | 4.397, 4.538 | <0.001  | 0.126          |
| <b>Risk perception</b>        |                             |              |                    |              |         |                |
| Ethical                       | 4.712 (0.030)               | 4.652, 4.771 | 4.697 (0.044)      | 4.610, 4.783 | 0.791   | -              |
| Financial - Investment        | 4.299 (0.030)               | 4.240, 4.358 | 4.597 (0.044)      | 4.511, 4.683 | <0.001  | 0.010          |



Altruistic motivation in COVID-19 challenge trial volunteers 12

|                                                                                                                                                                                                                                                                                                                                                  |                  |               |                  |               |                |                      |
|--------------------------------------------------------------------------------------------------------------------------------------------------------------------------------------------------------------------------------------------------------------------------------------------------------------------------------------------------|------------------|---------------|------------------|---------------|----------------|----------------------|
| Financial - Gambling                                                                                                                                                                                                                                                                                                                             | 5.569 (0.039)    | 5.493, 5.645  | 5.226 (0.056)    | 5.115, 5.336  | <0.001         | 0.008                |
| Health/Safety                                                                                                                                                                                                                                                                                                                                    | 4.836 (0.027)    | 4.783, 4.890  | 4.971 (0.040)    | 4.893, 5.050  | 0.009          | 0.002                |
| Recreational                                                                                                                                                                                                                                                                                                                                     | 4.074 (0.028)    | 4.018, 4.130  | 4.694 (0.041)    | 4.613, 4.775  | <0.001         | 0.046                |
| Social                                                                                                                                                                                                                                                                                                                                           | 2.710 (0.026)    | 2.660, 2.760  | 3.468 (0.037)    | 3.395, 3.541  | <0.001         | 0.082                |
| <b>Perceived benefits</b>                                                                                                                                                                                                                                                                                                                        | <b>Mean (SE)</b> | <b>95% CI</b> | <b>Mean (SE)</b> | <b>95% CI</b> | <b>p-value</b> | <b>η<sup>2</sup></b> |
| Ethical                                                                                                                                                                                                                                                                                                                                          | 2.041 (0.026)    | 1.990, 2.093  | 2.831 (0.038)    | 2.757, 2.906  | <0.001         | 0.085                |
| Financial - Investment                                                                                                                                                                                                                                                                                                                           | 3.729 (0.032)    | 3.665, 3.793  | 3.638 (0.047)    | 3.545, 3.730  | 0.135          | -                    |
| Financial - Gambling                                                                                                                                                                                                                                                                                                                             | 2.035 (0.034)    | 1.969, 2.101  | 3.027 (0.049)    | 2.931, 3.123  | <0.001         | 0.081                |
| Health/Safety                                                                                                                                                                                                                                                                                                                                    | 1.796 (0.025)    | 1.719, 1.819  | 2.529 (0.037)    | 2.457, 2.601  | <0.001         | 0.084                |
| Recreational                                                                                                                                                                                                                                                                                                                                     | 3.267 (0.034)    | 3.201, 3.333  | 3.015 (0.049)    | 2.919, 3.111  | <0.001         | 0.006                |
| Social                                                                                                                                                                                                                                                                                                                                           | 4.370 (0.027)    | 4.317, 4.423  | 3.937 (0.039)    | 3.860, 4.014  | <0.001         | 0.025                |
| <p><i>Comparison F-tests were performed for the volunteer and control groups on all three separate scale scores for the DOSPERT risk assessment test, controlled for age, income, country of residence, education level and gender (using an ANCOVA model with Age as a covariate and the other categorical variables as fixed effects).</i></p> |                  |               |                  |               |                |                      |
